# Supplementary material for: Dual inhibition of aminoacyl-tRNA synthetase interacting multifunctional protein-2 and α-synuclein by steroid derivative is neuroprotective in Parkinson’s model
Source: PubMed Central journal article supplement — iScience. 2024 Oct 11;27(11):111165. doi: 10.1016/j.isci.2024.111165 (PMC11576395; doi:10.1016/j.isci.2024.111165), 2024-10-11
Supplement: mmc1.pdf [file mmc1.pdf]

iScience, Volume 27

## **Supplemental information**

### **Dual inhibition of aminoacyl-tRNA synthetase interacting multifunctional protein-2 and $\alpha$ -synuclein by steroid derivative is neuroprotective in Parkinson's model**

**Jeong-Yong Shin, Min Woo Ha, Ji Hun Kim, Jiwon Cheon, Gum Hwa Lee, Seung-Mann Paek, and Yunjong Lee**

<Spectral data of SG13-135>

2027\_SMI3-135

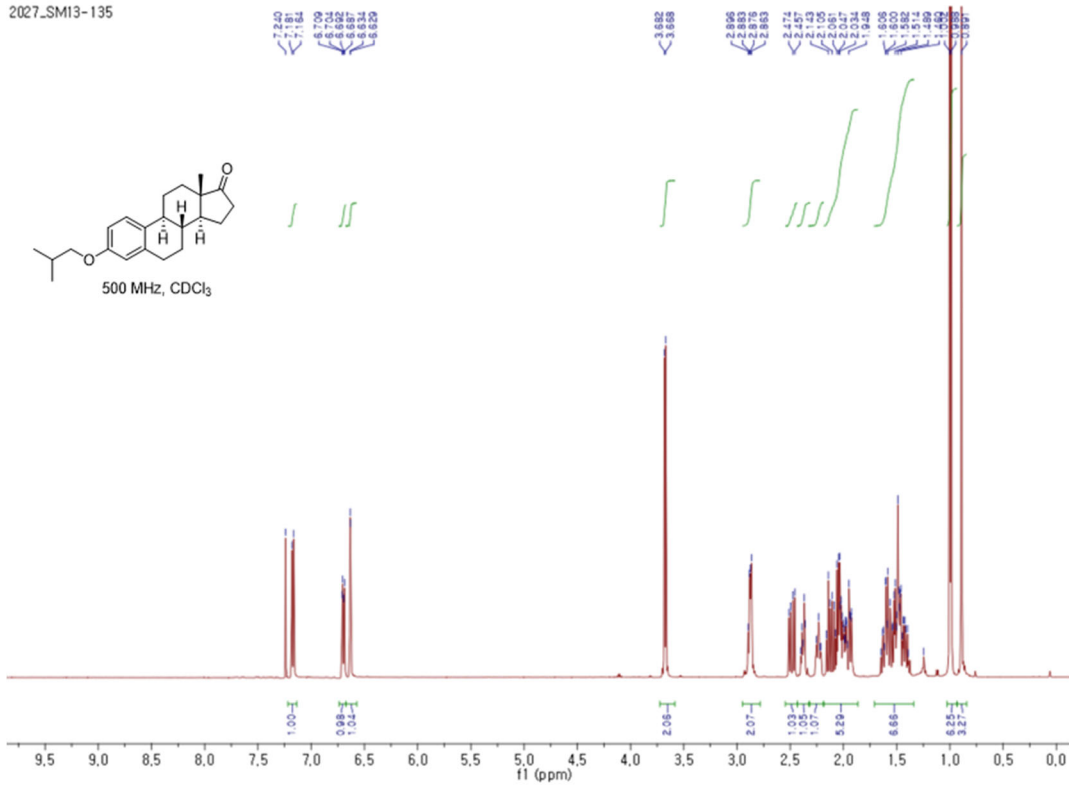

0413\_SMI3-135

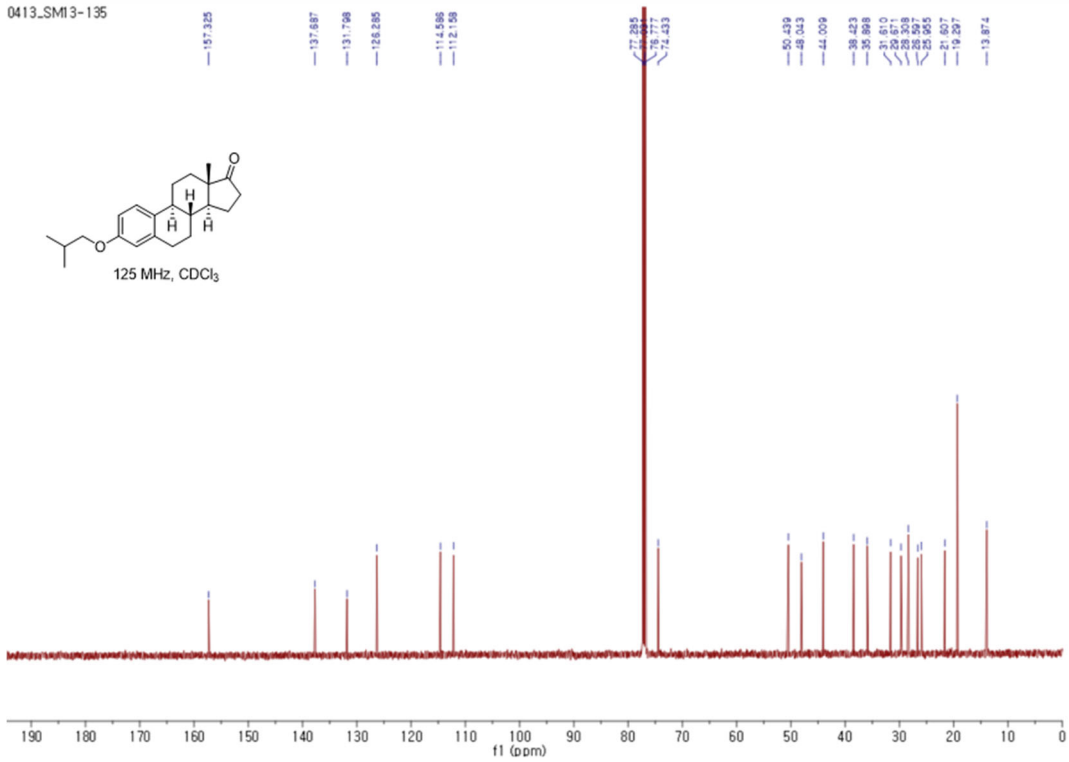

**Single Mass Analysis**

Tolerance = 20.0 PPM | DBE: min = -3.0, max = 100.0

Element prediction: Off

Number of isotope peaks used for iFIT = 9

Monoisotopic Mass, Even Electron Ions

22 formulae evaluated with 1 result within limits (up to 10 closest results for each mass)

Elements Used

| Mass     | Calc. Mass | mDa  | PPM  | DBE | Formula                                        | iFIT   | iFIT Norm | Fit Conf % | C  | H  | O |
|----------|------------|------|------|-----|------------------------------------------------|--------|-----------|------------|----|----|---|
| 327.2317 | 327.2324   | -0.7 | -2.1 | 7.5 | C <sub>22</sub> H <sub>31</sub> O <sub>2</sub> | 1741.6 | n/a       | n/a        | 22 | 31 | 2 |

20220413\_SM13-135\_ASAP\_1415 (3.848)  
1. TOP MS ASAP+

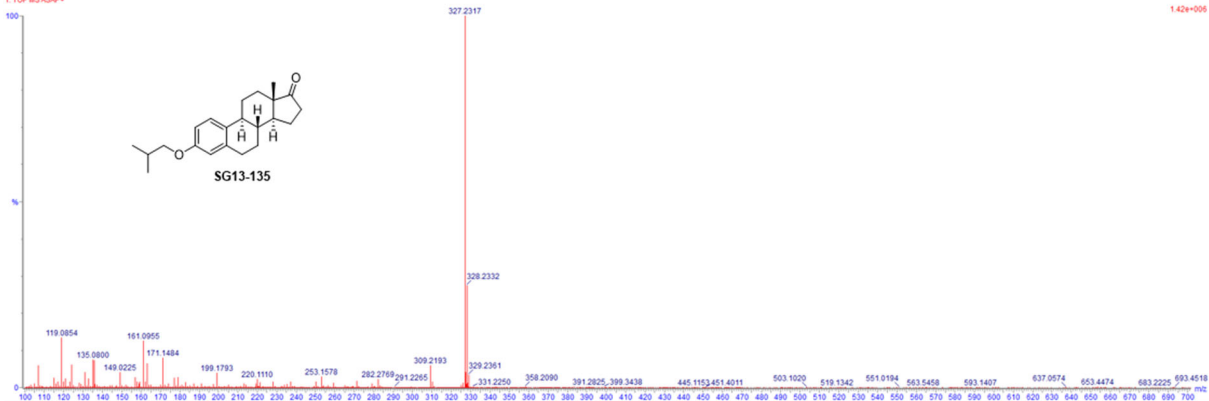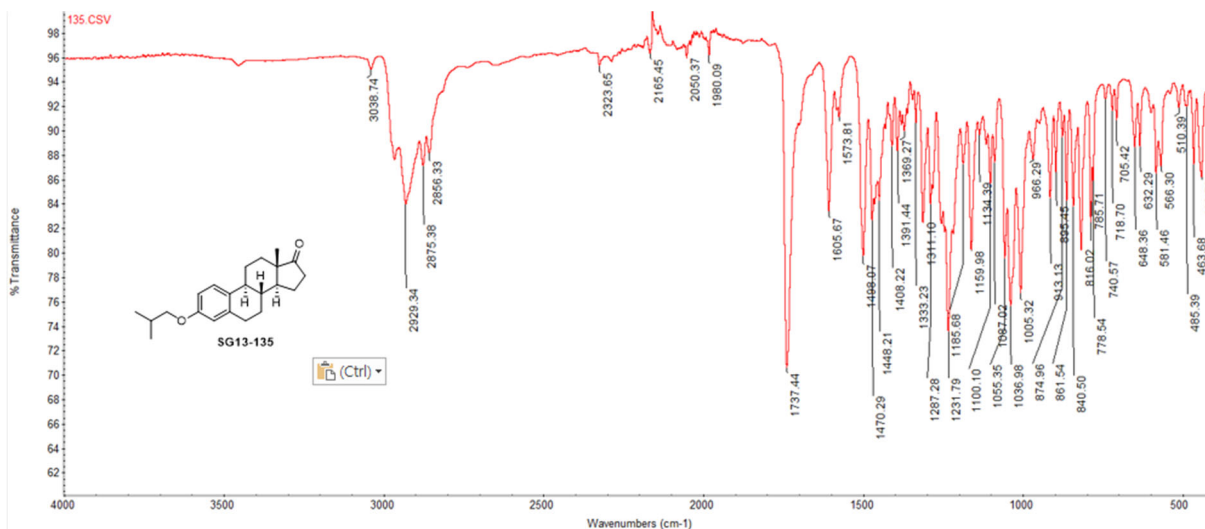

<Spectral data of SG13-136>

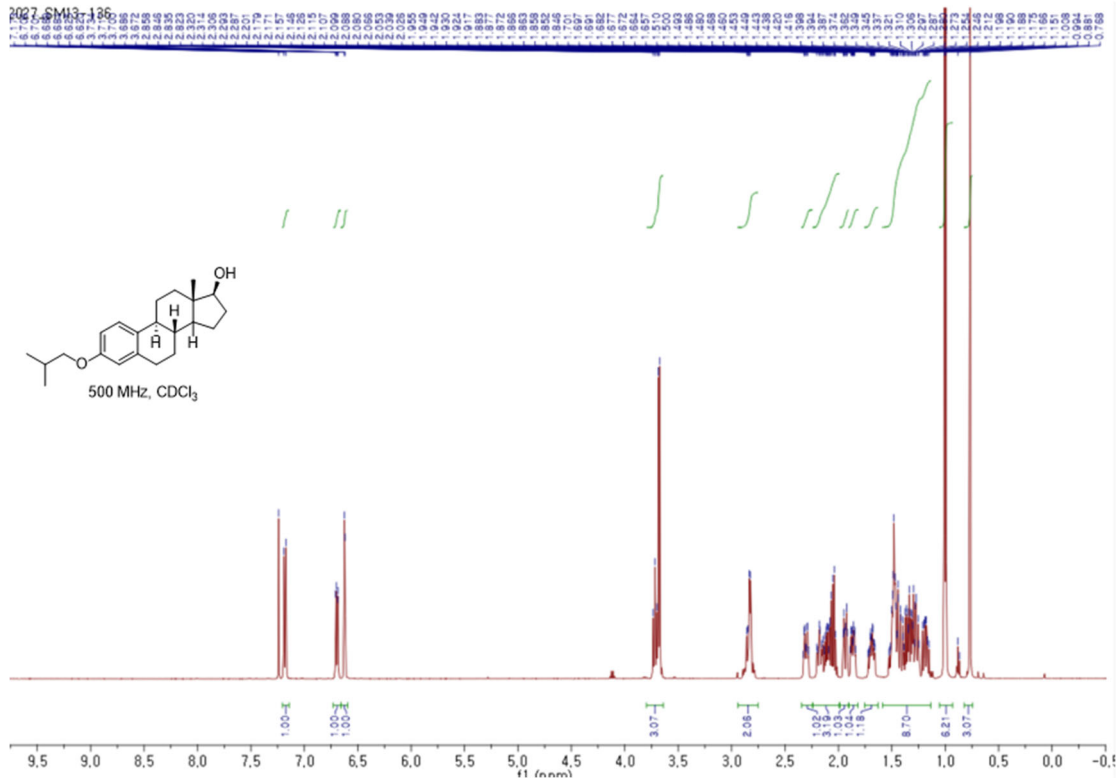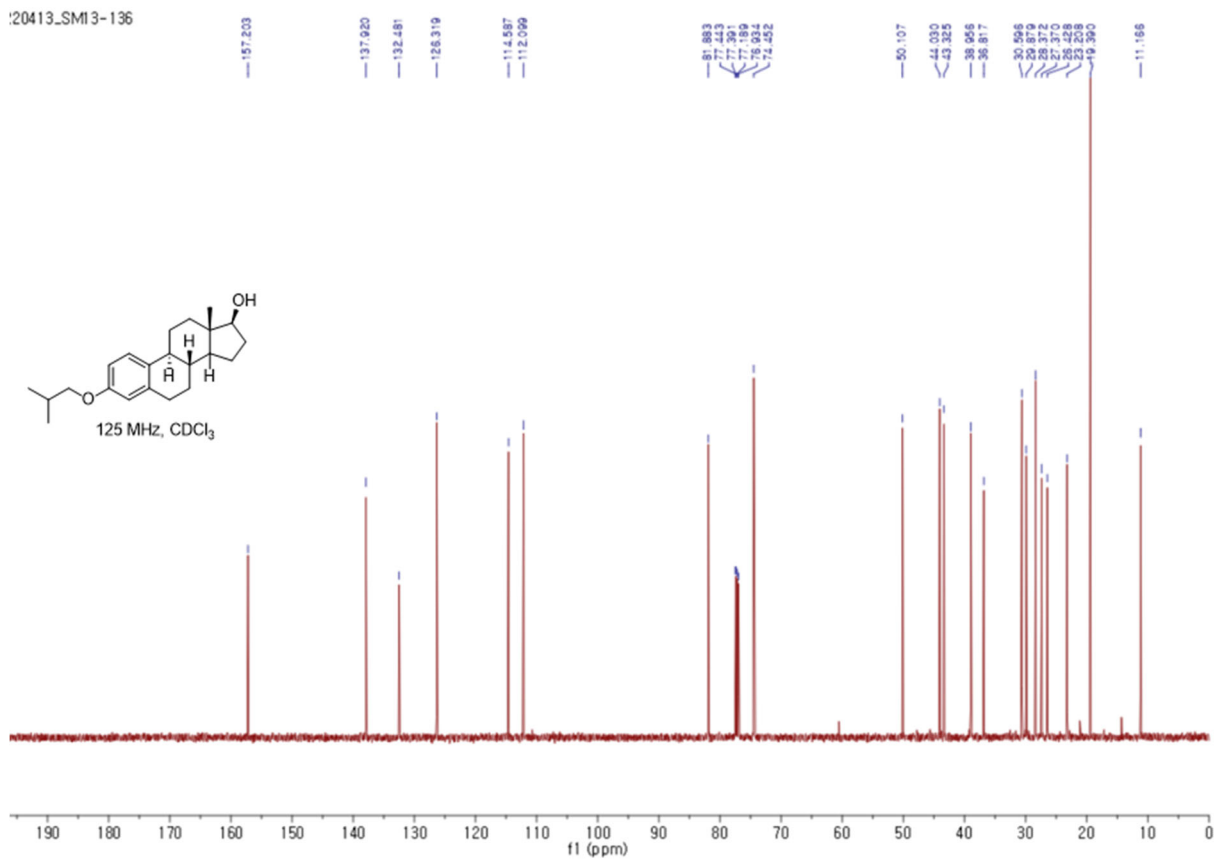

Single Mass Analysis

Tolerance = 30.0 PPM / DBE: min = -3.0, max = 100.0

Element prediction: C#F

Number of isotopic peaks used for i-FT = 9

Monoisotopic Mass, Even Electron Ions

23 formula(s) evaluated with 1 result within limits (up to 10 closest results for each mass)

Elements Used

| Mass     | Calc. Mass | mDa  | PPM  | DBE | Formula    | i-FT   | i-FT Norm | Fit Conf % | C  | H  | O |
|----------|------------|------|------|-----|------------|--------|-----------|------------|----|----|---|
| 329.2480 | 329.2481   | -0.1 | -0.3 | 6.5 | C22 H33 O2 | 1000.0 | 1000.0    | 100        | 22 | 33 | 2 |

20220413\_0M13-136\_ADAP 523 (4.843)

1: TOF MS ADAP+

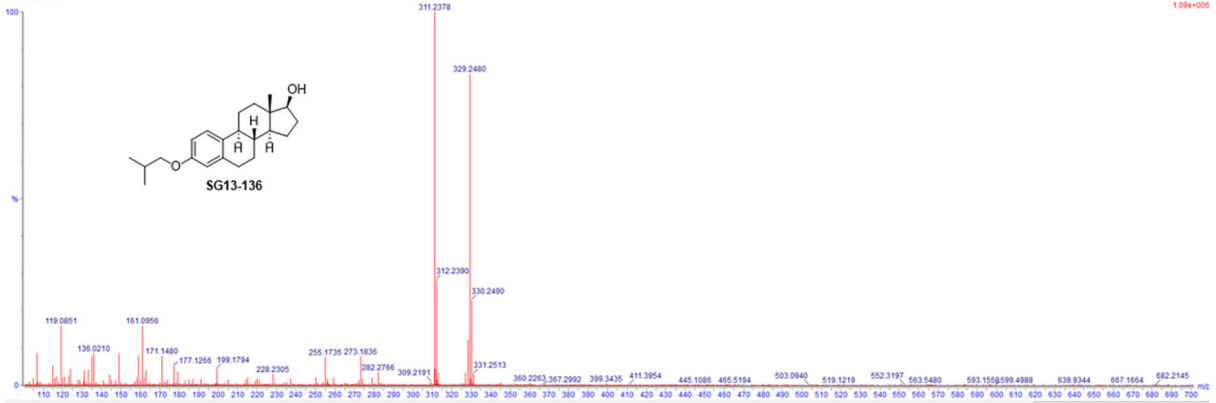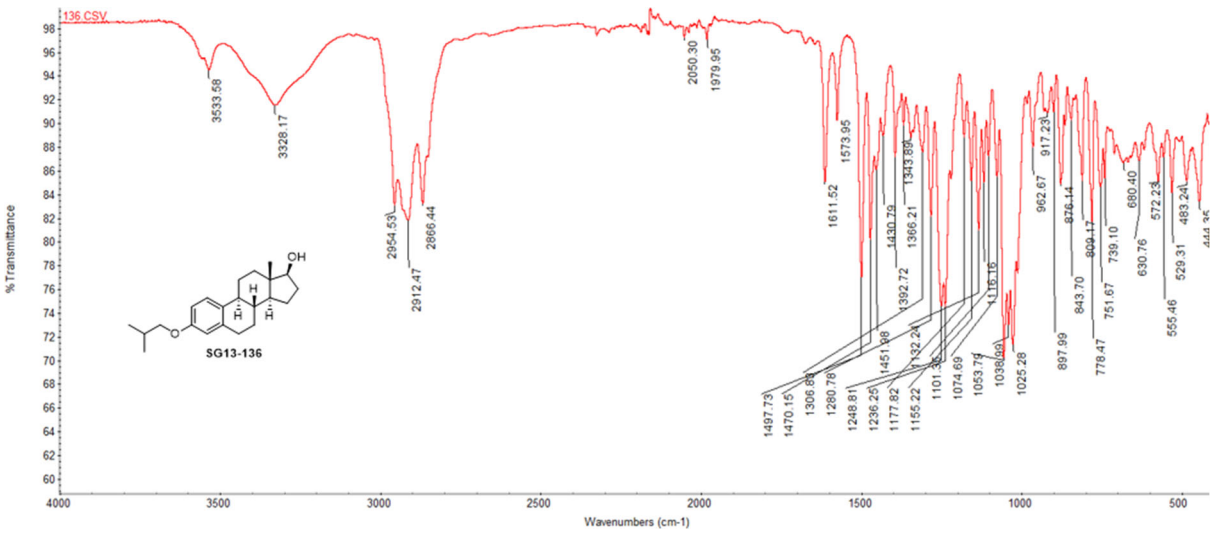

<Spectral data of SG13-138>

113-138

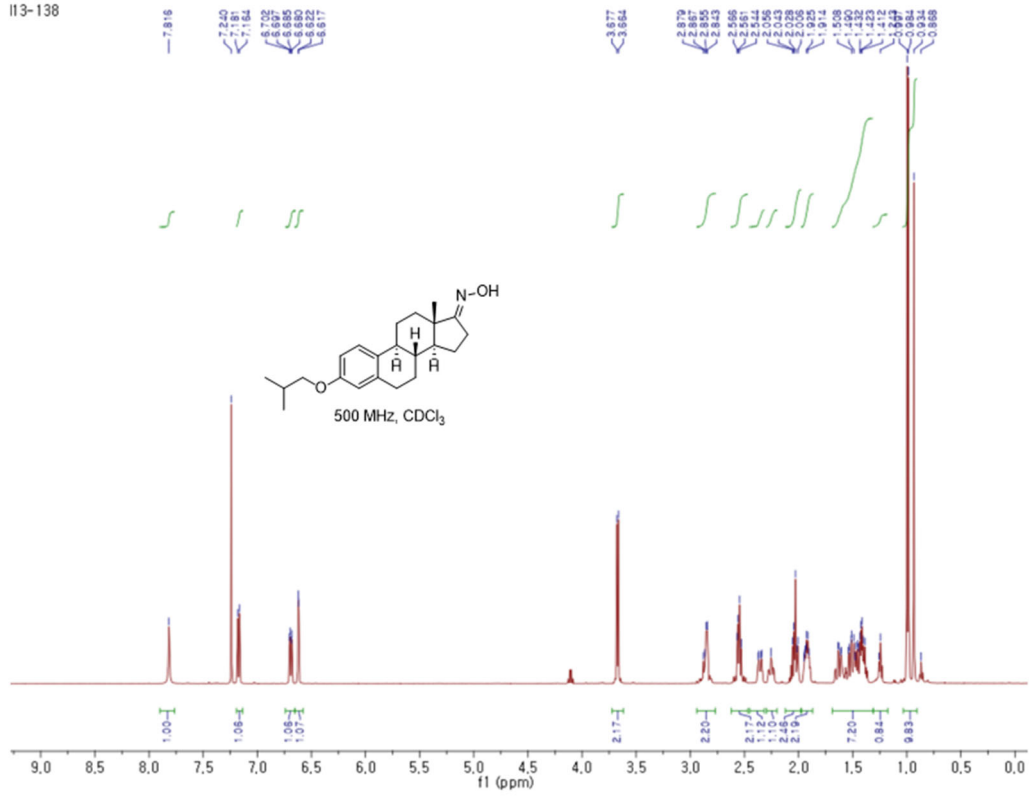

-138

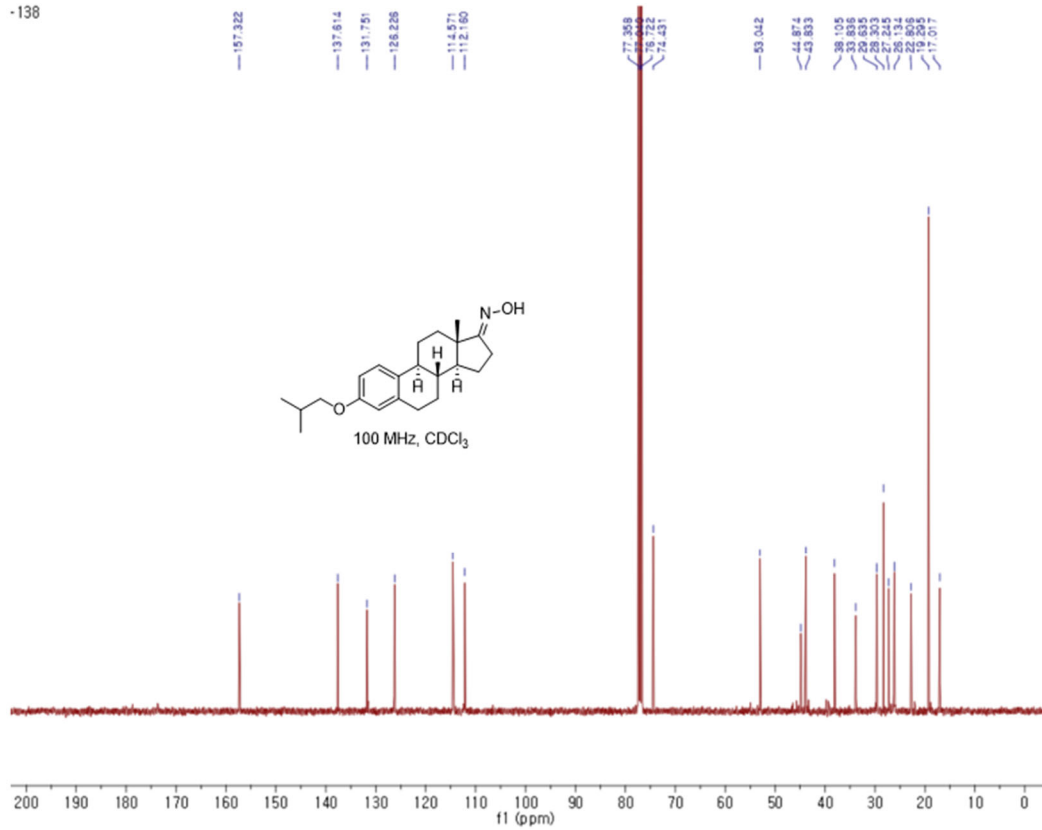

**Single Mass Analysis**  
Tolerance = 20.0 PPM / DBE: min = -30.0, max = 80.0  
Element prediction: C#F  
Number of isotope peaks used for iFIT = 5  
Monoisotopic Mass, Odd and Even Electron Ions  
102 formula(s) evaluated with 1 result within limits (up to 5 closest results for each mass)  
Elements Used:

| Mass     | Calc. Mass | mDa | PPM | DBE | Formula      | iFIT  | iFIT Norm | Fit Conf % | C  | H  | N | O |
|----------|------------|-----|-----|-----|--------------|-------|-----------|------------|----|----|---|---|
| 341.2355 | 341.2355   | 0.0 | 0.0 | 8.0 | C22 H31 N O2 | 102.7 | n/a       | n/a        | 22 | 31 | 1 | 2 |

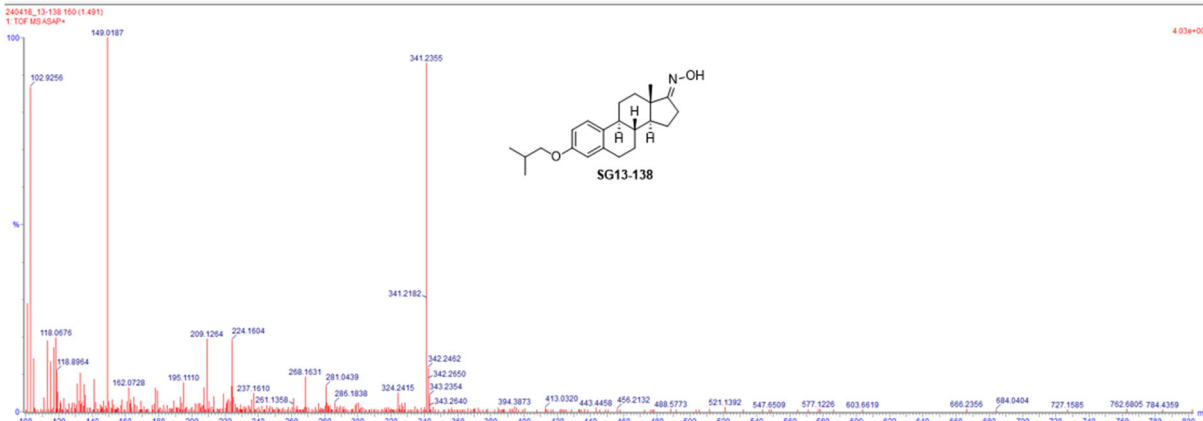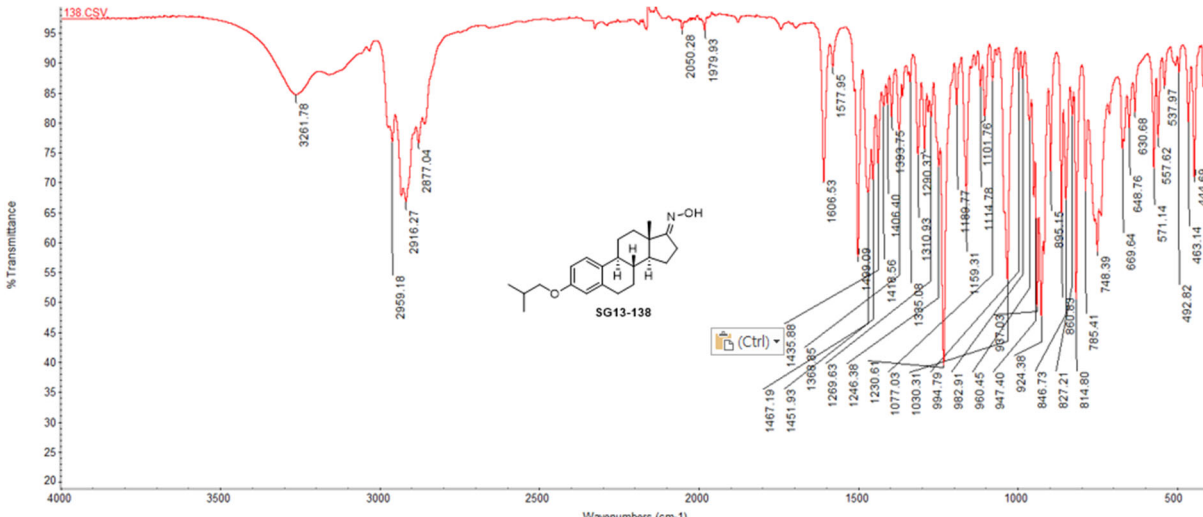

<Spectral data of SG13-140>

13-140

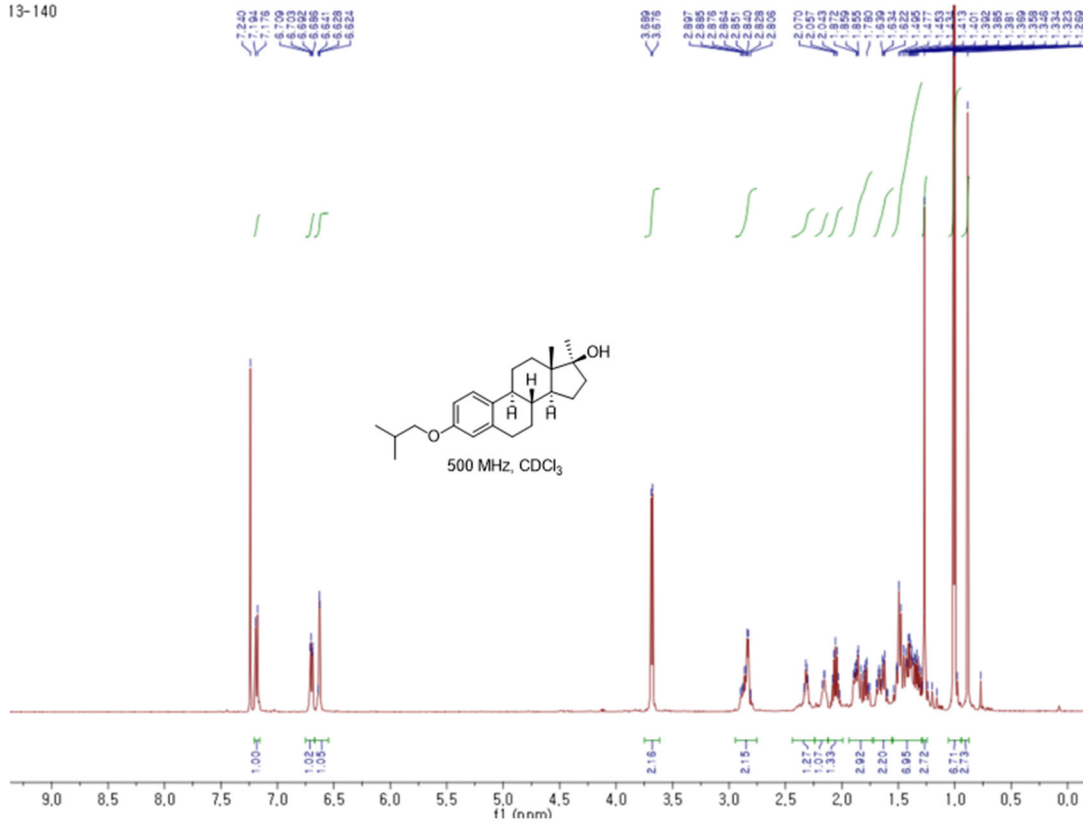

13-140

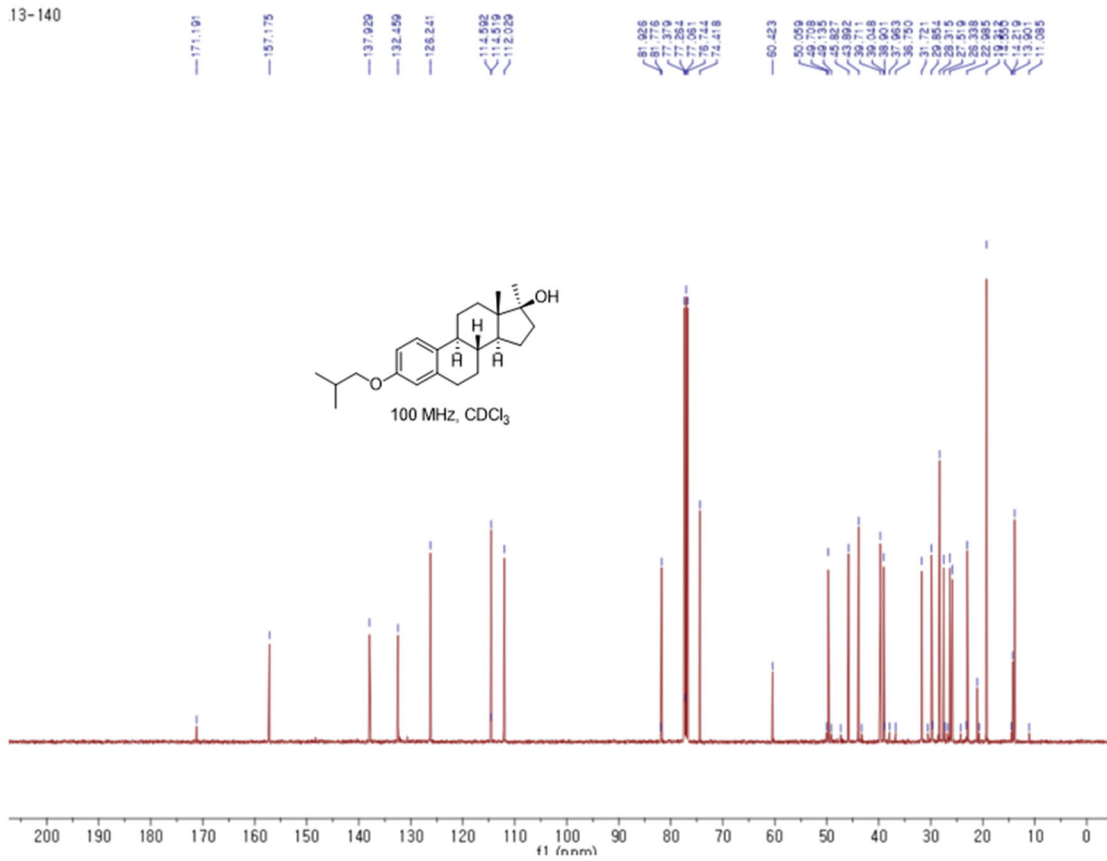



**Single Mass Analysis**  
 Tolerance = 20.0 PPM / DBE: min = -30.0, max = 80.0  
 Element prediction: Off  
 Number of isotope peaks used for i-FT = 5  
 Monoisotopic Mass, Odd and Even Electron Ions  
 25 formula(s) evaluated with 1 result within limits (up to 5 closest results for each mass)  
 Elements Used

| Mass    | Calc. Mass | mDa | PPM | DBE | Formula                                        | i-FT | i-FT Norm | Fit Conf % | C  | H  | O |
|---------|------------|-----|-----|-----|------------------------------------------------|------|-----------|------------|----|----|---|
| 342.260 | 342.259    | 0.1 | 0.3 | 7.0 | C <sub>23</sub> H <sub>34</sub> O <sub>2</sub> | 93.8 | n/a       | n/a        | 23 | 34 | 2 |

240418\_13-140.00 (0.645)

1: TDF.8045AP

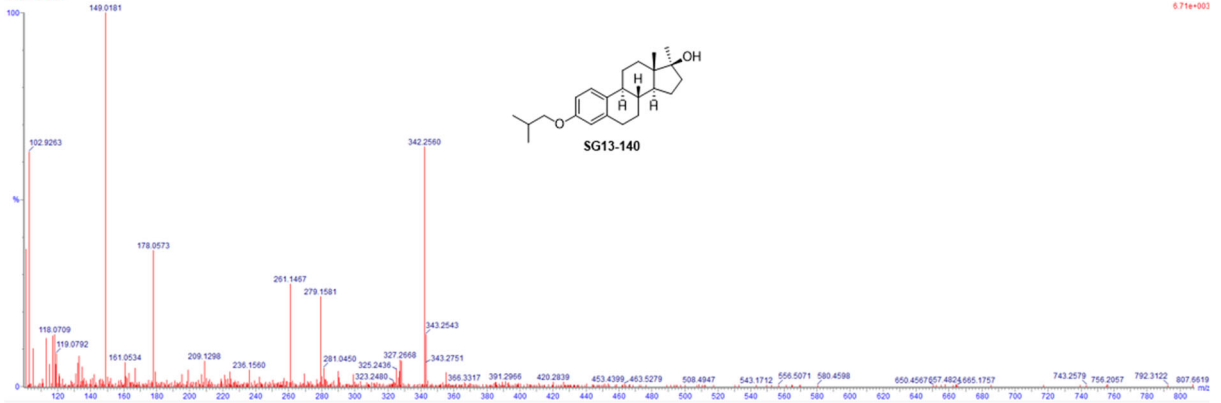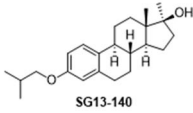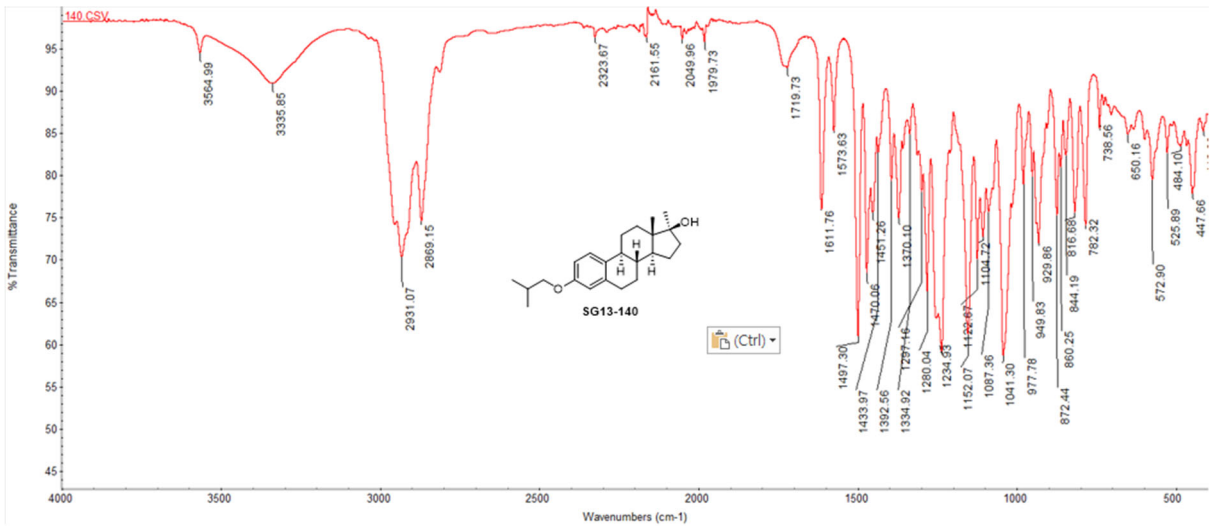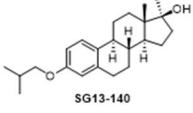

<Spectral data of SG13-141>

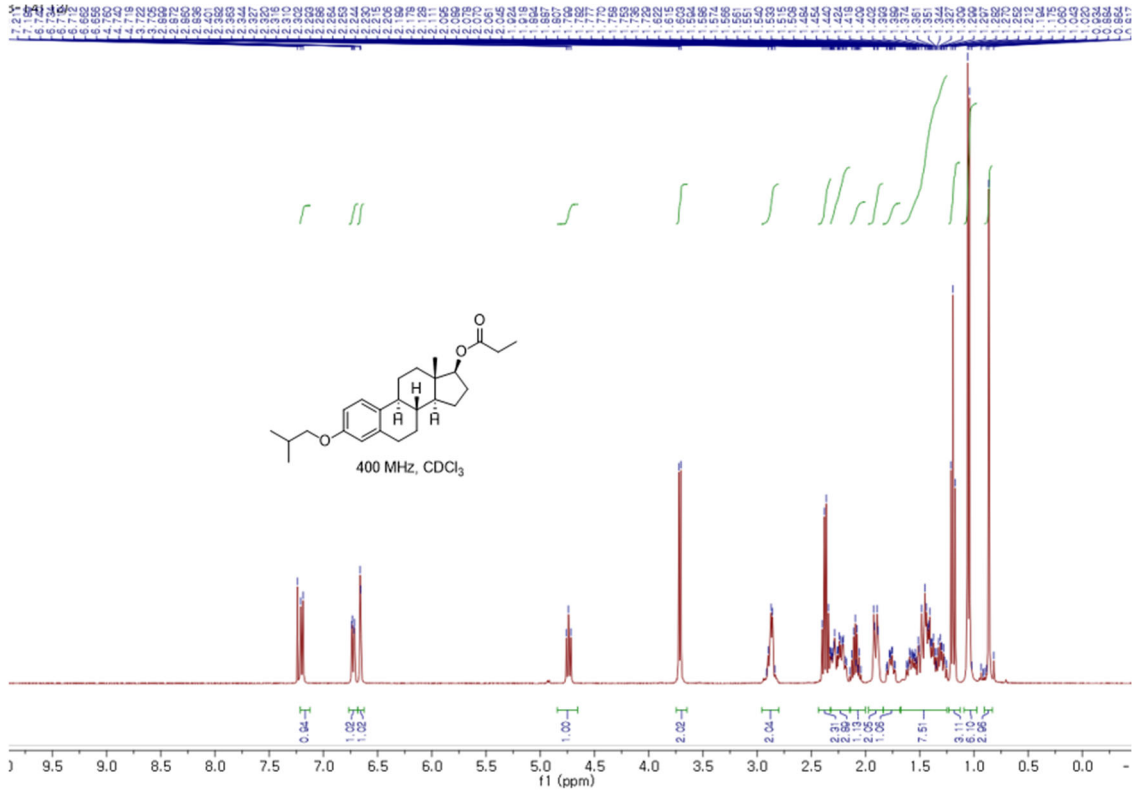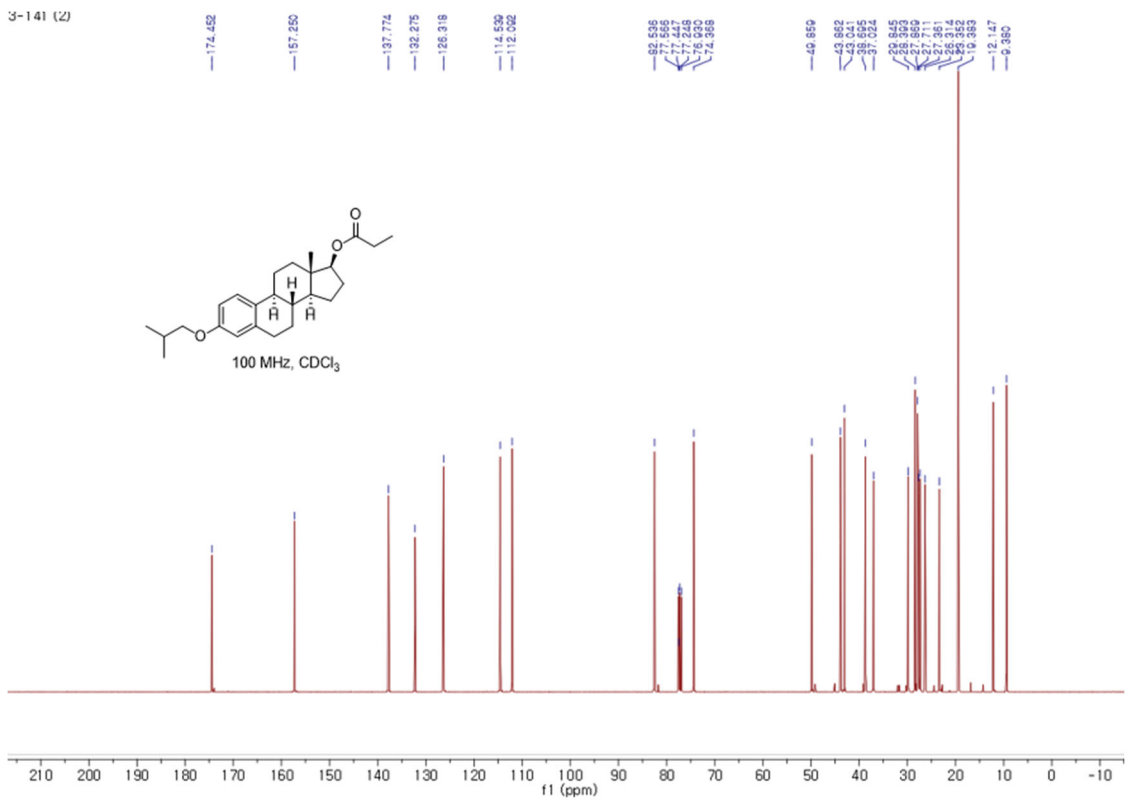

**Single Mass Analysis**

Tolerance = 20.0 PPM | DGE: min = -30.0, max = 80.0

Element prediction: O#

Number of isotope peaks used for iFIT = 5

Monoisotopic Mass, Even Electron Ions

42 formula(s) evaluated with 1 result within limits (up to 5 closest results for each mass)

Elements Used

| Mass     | Calc. Mass | mDa | PPM | DBE | Formula                                        | i-FIT | i-FIT Norm | Fit Conf % | C  | H  | O |
|----------|------------|-----|-----|-----|------------------------------------------------|-------|------------|------------|----|----|---|
| 385.2747 | 385.2743   | 0.4 | 1.0 | 7.5 | C <sub>25</sub> H <sub>37</sub> O <sub>3</sub> | 588.5 | n/a        | n/a        | 25 | 37 | 3 |

242425\_13-141\_356 (3.297)

1. TOP MS ASAP

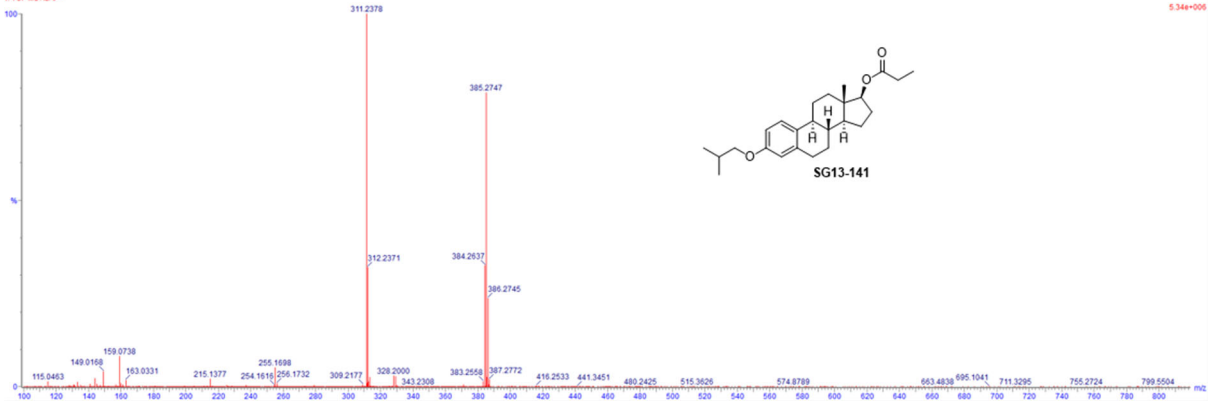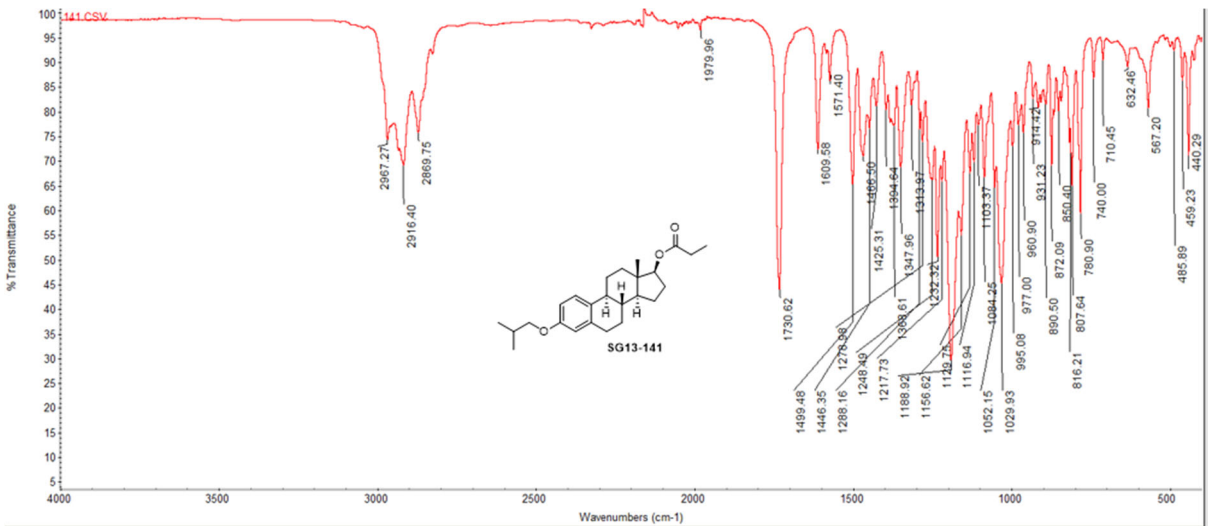

<Spectral data of SG13-158>

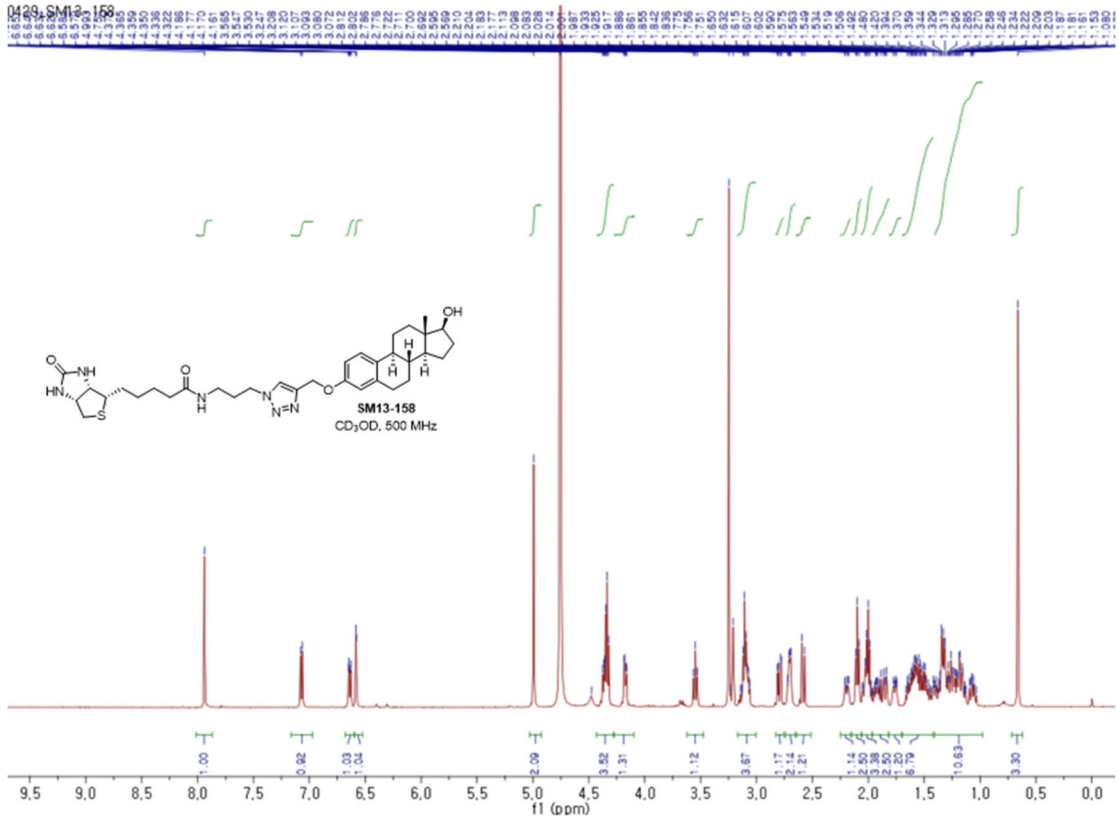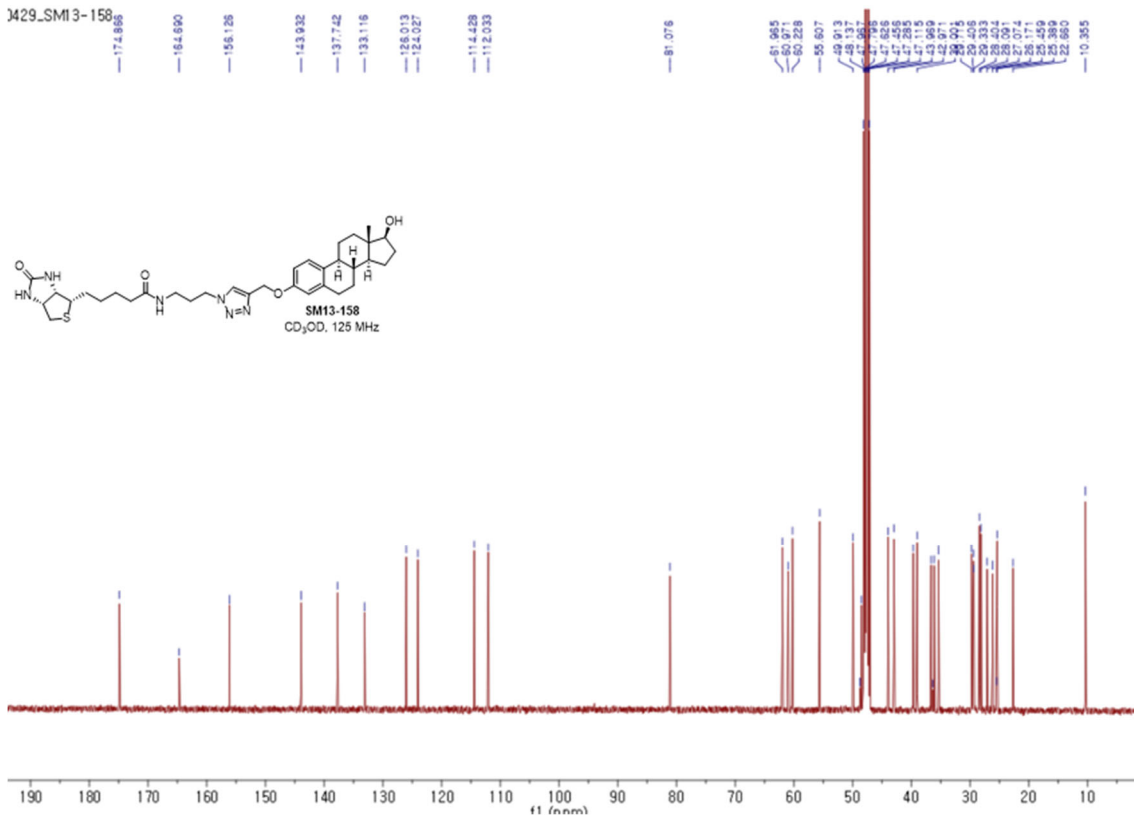

**Single Mass Analysis**

Tolerance = 20.0 PPM / DBE: min = -30.0, max = 80.0

Element prediction: Off

Number of isotope peaks used for i-FIT = 5

Monoisotopic Mass, Odd and Even Electron Ions

416 formula(e) evaluated with 13 results within limits (up to 5 closest results for each mass)

Elements Used:

| Mass     | Calc. Mass | mDa  | PPM  | DBE  | Formula         | i-FIT | i-FIT Norm | Fit Coef % | C  | H  | N | O | S |
|----------|------------|------|------|------|-----------------|-------|------------|------------|----|----|---|---|---|
| 637.3540 | 637.3536   | 0.4  | 0.6  | 13.5 | C34 H49 N6 O4 S | 96.7  | 1.969      | 13.07      | 34 | 49 | 6 | 4 | 1 |
|          | 637.3549   | -0.9 | -1.4 | 13.0 | C36 H51 N3 O5 S | 96.4  | 1.707      | 18.14      | 36 | 51 | 3 | 5 | 1 |
|          | 637.3523   | 1.7  | 2.7  | 14.0 | C32 H47 N9 O3 S | 96.9  | 2.218      | 10.88      | 32 | 47 | 9 | 3 | 1 |
|          | 637.3563   | -2.3 | -3.6 | 18.0 | C37 H47 N7 O 5  | 96.1  | 1.409      | 24.44      | 37 | 47 | 7 | 1 | 1 |
|          | 637.3576   | -1.6 | -5.6 | 17.5 | C39 H49 N4 O2 S | 95.8  | 1.122      | 32.57      | 39 | 49 | 4 | 2 | 1 |

140418\_13-158 505 (5.505)

1: TOF MSABAP+

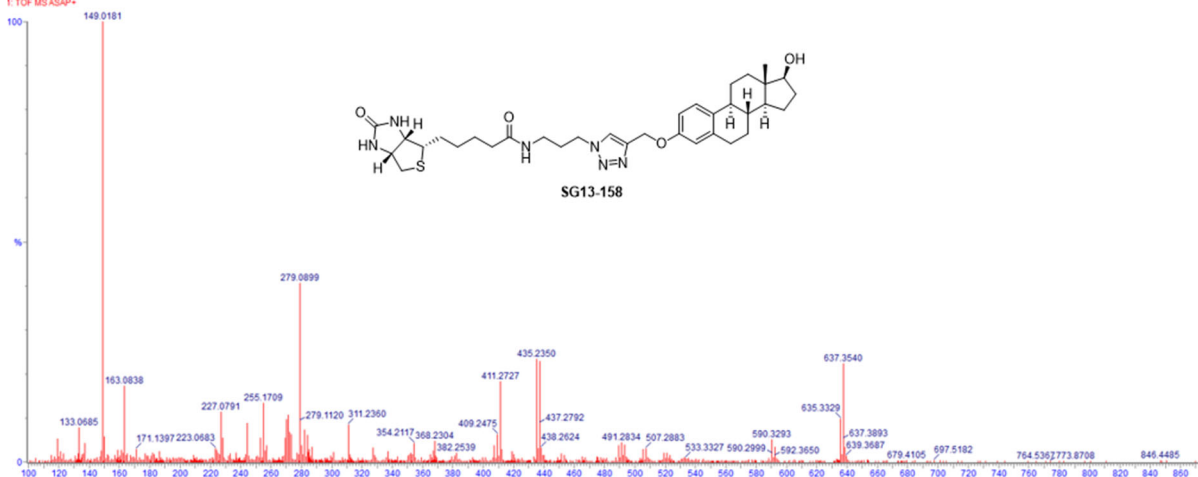

**Data S1. Related to Figure 1. Chemical structures and  $^1\text{H}$ -NMR spectra of newly synthesized steroid derivatives.**

The  $^1\text{H}$ -NMR spectra illustrate the chemical structures of designated compounds (SG13-135, SG-13-136, SG13-138, SG13-140, SG13-141, and SG13-158).

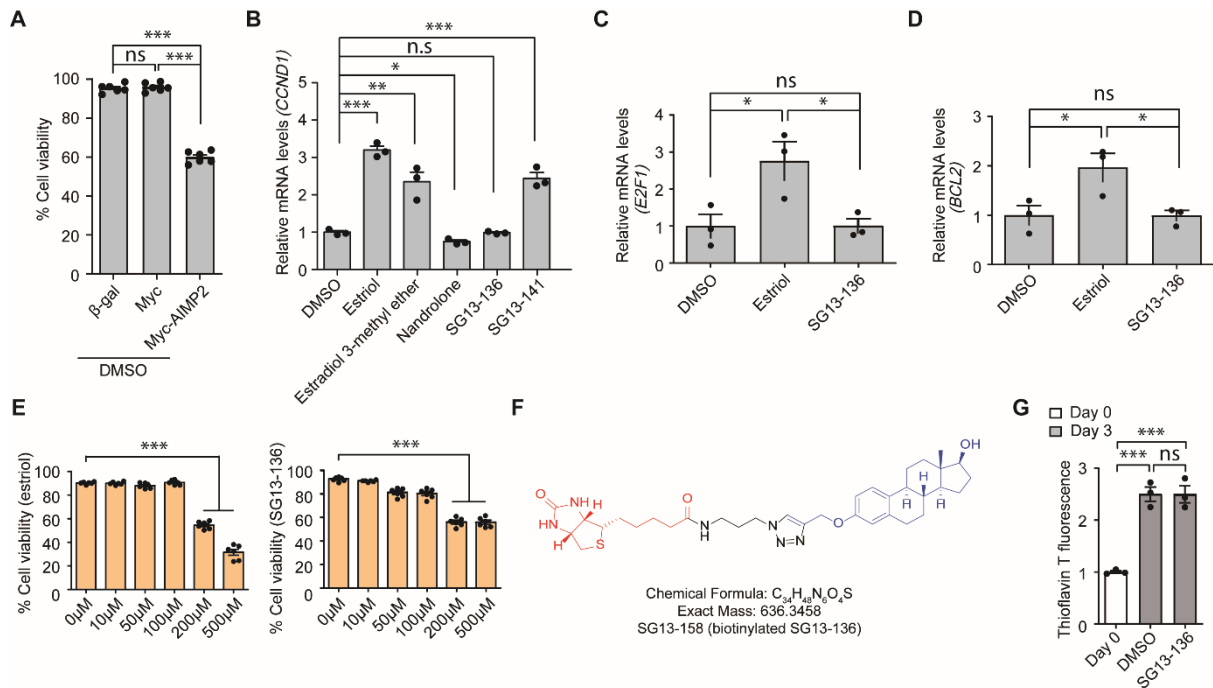

**Supplementary Figure 1. Related to Figure 2 and 3. Reduction of cytotoxicity, absence of estrogenic activity, and no inhibition of Tau aggregation of SG13-136.**

(A) Trypan blue exclusion cell viability assessment conducted in SH-SY5Y cells transfected with  $\beta$ -gal, Myc empty vector control, or Myc-AIMP2 (72 h) (n = 6 per group).

(B) Quantification of the estrogen responsive gene, *CCND1* messenger RNA levels in a human breast tumor cell line, MCF7, treated with the specified compounds (10  $\mu$ M, 48 h), monitored by real-time quantitative PCR (n = 3 separate experiments per group). *GAPDH* served as an internal loading control for normalization.

(C, D) Quantification of estrogen responsive genes, *E2F1*, *BCL2* messenger RNA levels in the human breast tumor cell line, MCF7 treated with the indicated compounds (10  $\mu$ M, 48 h) (n = 3 separate experiments per group). *GAPDH* served as internal loading control for normalization.

(E) Trypan blue exclusion cell viability assessment conducted in SH-SY5Y cells treated with increasing concentrations of estriol or SG13-136 (0, 10, 50, 100, 200, 500  $\mu$ M, 48 h) (n = 6 separate experiments per group).

(F) Chemical structure of biotin-conjugated SG13-136 (also named SG13-158), along with chemical formula and mass.

(G) Amyloid-like aggregation of recombinant tau incubated for three days (20  $\mu$ M in PBS with 5  $\mu$ M heparin) in the presence of indicated compounds (50  $\mu$ M), monitored by thioflavin T fluorescence assay (n = 3 per group). Thioflavin T measurement of recombinant tau at day 0 served as baseline, with DMSO as vehicle control.

Data in all panels represent mean  $\pm$  standard error of the mean. \* $P$  < 0.05, \*\* $P$  < 0.01, and \*\*\* $P$  < 0.001, determined by one-way (A, B, C, D, and E) or two-way (G) analysis of variance (ANOVA) followed by Tukey's post hoc analysis.

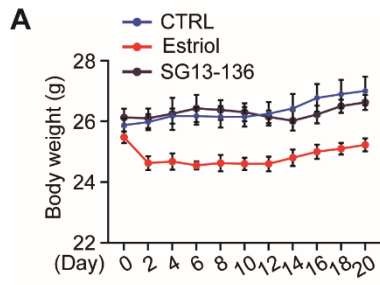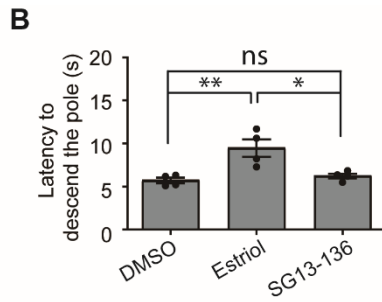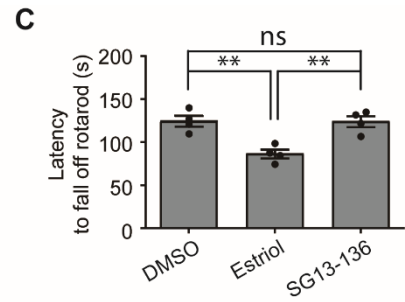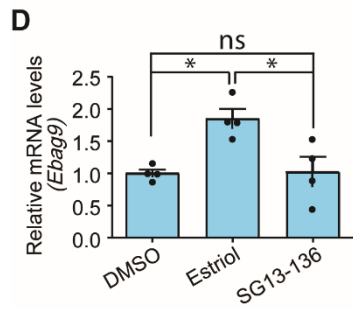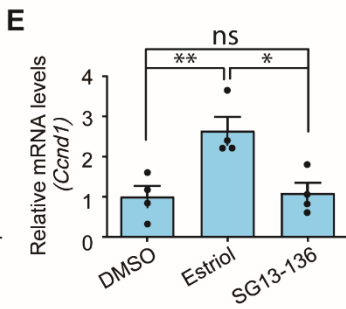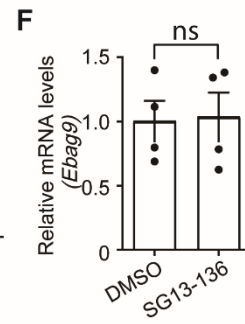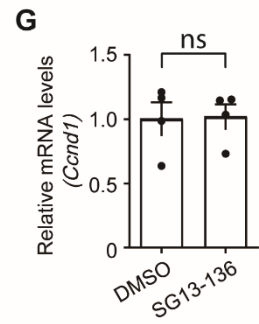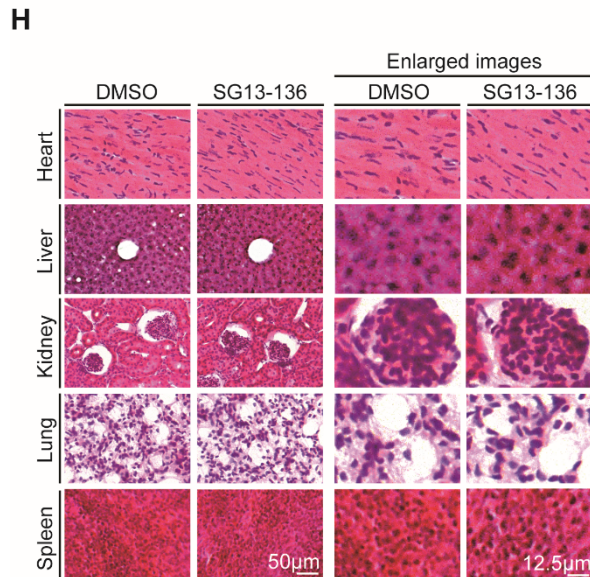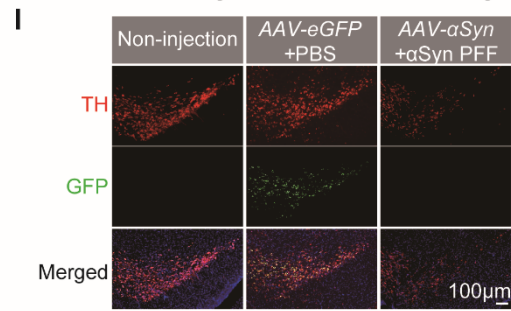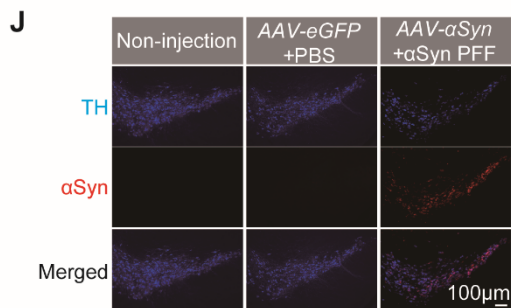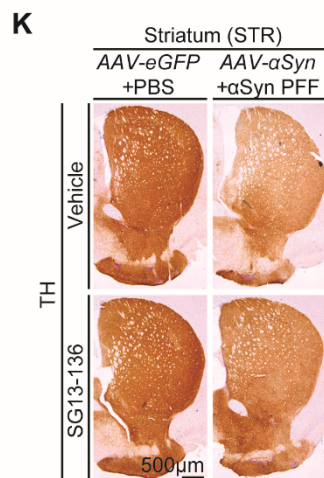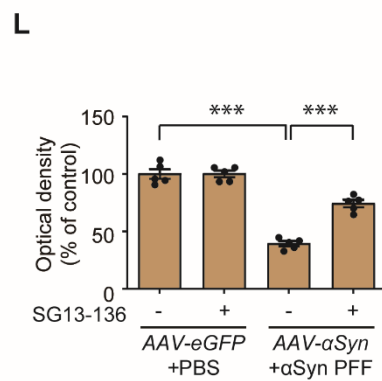



**Supplementary Figure 2. Related to Figure 5. The steroid derivative, SG13-136, devoid of estrogenic activity, showed no organ toxicity and conferred protection to dopaminergic axon in a  $\alpha$ Syn PFF/AAV- $\alpha$ Syn injection PD mouse model.**

(A) Measurement of mouse body weights (every two days) with daily administrations of vehicle, estriol, or SG13-136 (0.5 mg/kg/d, p.o. for 20 days) (n = 4 mice per group).

(B) Assessment of bradykinesia in wild-type mice administered with vehicle DMSO, estriol, or SG13-136 (0.5 mg/kg, p.o. once daily for three weeks) or vehicle monitored by pole test (n = 4 mice per group).

(C) Assessment of motor coordination in wild-type mice administered with vehicle DMSO, estriol, or SG13-136 (0.5 mg/kg, p.o. once daily for three weeks) or vehicle monitored by pole test (n = 4 mice per group).

(D) Quantification of the estrogen responsive gene, *Ebag9* messenger RNA levels in brains from the mice with the indicated compound administration (0.5 mg/kg/d estriol, or SG13-136, p.o., for three weeks) monitored by real-time quantitative PCR and normalized by *Gapdh* internal loading control (n = 4 mice per group).

(E) Quantification of the estrogen responsive gene, *Ccnd1* messenger RNA levels in brains from the mice with the indicated compound administration (0.5 mg/kg/d estriol, or SG13-136, p.o., for three weeks) monitored by real-time quantitative PCR and normalized by *Gapdh* internal loading control (n = 4 mice per group).

(F, G) Quantification of the estrogen responsive genes, *Ebag9*, *Ccnd1* messenger RNA levels in liver tissues from the mice with the administration of SG13-136 (0.5 mg/kg/d, p.o., for three weeks) monitored by real-time quantitative PCR and normalized by *Gapdh* internal loading control (n = 4 mice per group).

(H) Representative H&E staining images of tissue sections (heart, liver, kidney, lung, and spleen) from the mice administered with vehicle or SG13-136 (0.5 mg/kg/d, p.o., for three weeks). Enlarged images were also presented in the right panel. Scale bar = 50, and 12.5  $\mu\text{m}$ , respectively.

(I, J) Representative co-immunofluorescence images showing the expression and distribution of eGFP and  $\alpha$ -synuclein in dopaminergic neurons labeled with TH on coronal ventral midbrain sections from each experimental mouse groups. Scale bar = 100  $\mu\text{m}$ .

(K) Representative anti-TH immunohistochemistry images of the striatum coronal sections from each mouse group with the indicated nigral injections and SG13-136 p.o. administration. Scale bar = 500  $\mu\text{m}$ .

(L) Quantification of relative TH-stained dopaminergic axon terminal densities in the striatum of the indicated experimental groups (n = 5 mice per group).

Data in all panels represent mean  $\pm$  standard error of the mean. \* $P < 0.05$ , \*\* $P < 0.01$ , and \*\*\* $P < 0.001$ , determined by unpaired two-tailed Student's t-test (F, and G), one-way (B, C, D, and E) or two-way (L) analysis of variance (ANOVA) followed by Tukey's post hoc analysis. n.s., non-significant.
